# Supplementary material
Source: MDPI journal article supplement (https://www.mdpi.com/2227-9717/10/12/2506)
Supplement: s1 [file s1]

*Supporting Information For:*

# **The Dynamic Shift of Bacterial Communities in Hybrid Anaerobic Baffled Reactor (ABR)—Aerobic Granules Process for Berberine Pharmaceutical Wastewater Treatment**

**Yan Wang <sup>1,2</sup>, Yongqiang Liu <sup>3</sup>, Juan Li <sup>1,2</sup>, Ruirui Ma <sup>1,2</sup>, Ping Zeng <sup>1,2,\*</sup>, Choon Aun Ng <sup>4</sup> and Fenghua Liu <sup>5</sup>**

<sup>1</sup> State Key Laboratory of Environmental Criteria and Risk Assessment, Chinese Research Academy of Environmental Sciences, Beijing 100012, China

<sup>2</sup> Department of Urban Water Environmental Research, Chinese Research Academy of Environmental Sciences, Beijing 100012, China

<sup>3</sup> Faculty of Engineering and Physical Sciences, University of Southampton, Southampton SO17 1BJ, UK

<sup>4</sup> Department of Environmental Engineering, Faculty of Engineering and Green Technology, Universiti Tunku Abdul Rahman, Kampar 31900, Perak, Malaysia

<sup>5</sup> CECEP Engineering Technology Research Institute Co., Ltd., Beijing 100082, China

\* Correspondence: zengping@craes.org.cn; Mailing address: Chaoyang district, Beiyuan Road, Dayangfang 8, Beijing, China Phone: 86-10-84917906. Fax: 86-10-84917906

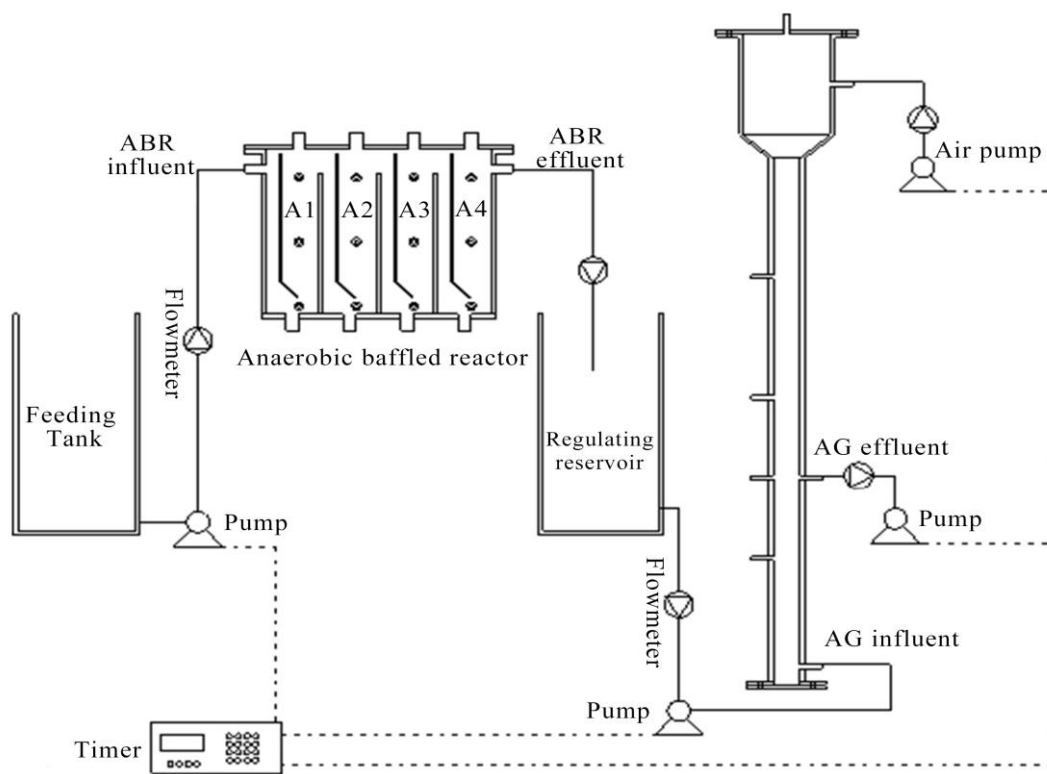

Figure. S1. The image of the hybrid ABR-AGS system.

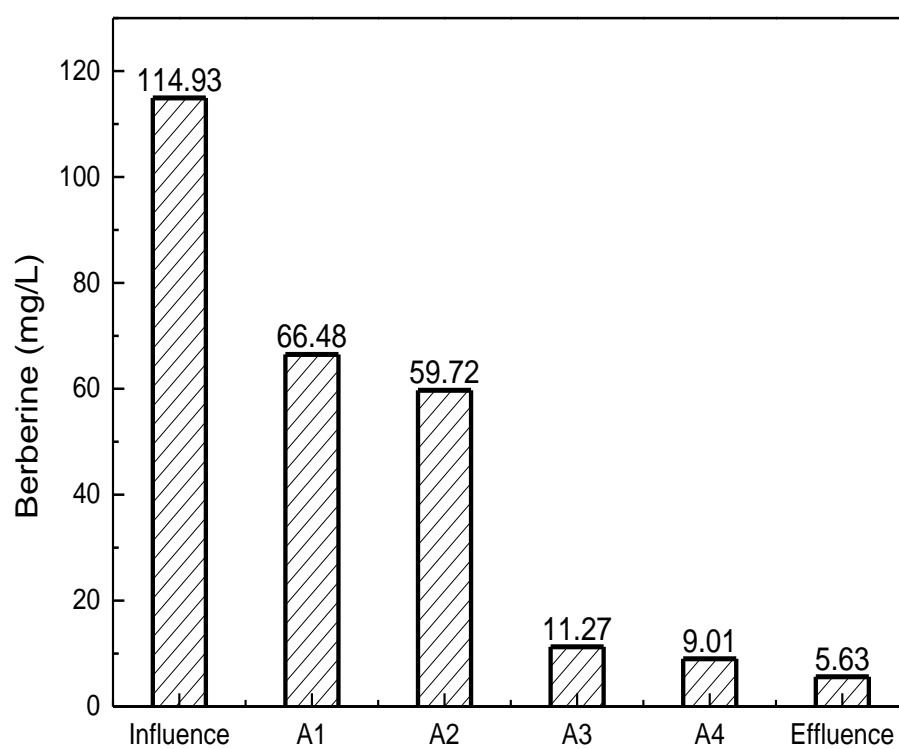

**Figure. S2** The change in the berberine concentration from A1 to A4

Table S1 Physical and chemical properties of inoculum

| Reactor | SVI (ml/g) | MLVSS/MLSS (%) | MLSS (mg/L) |
|---------|------------|----------------|-------------|
| ABR     | 102.4      | 82             | 13570       |
| AGS     | 95.7       | 27             | 2350        |

Table S2 The operation conditions of the hybrid ABR–AGS system

| Reactor | Parameter                               | Value   |
|---------|-----------------------------------------|---------|
| ABR     | Influent berberine concentration (mg/L) | 120     |
|         | HRT (d)                                 | 3       |
|         | OLR(kg/(m <sup>3</sup> .d))             | 0.8-1.3 |
| AGS     | HRT (hr)                                | 6       |
|         | OLR(kg/(m <sup>3</sup> .d))             | 3       |

Table S3 The composition of influent wastewater

| Components                           | Concentration (mg/L) |
|--------------------------------------|----------------------|
| COD                                  | 4253                 |
| NH <sub>4</sub> Cl                   | 535                  |
| KH <sub>2</sub> PO <sub>4</sub>      | 104.6                |
| CaCl <sub>2</sub> ·2H <sub>2</sub> O | 19.3                 |
| MgSO <sub>4</sub> ·7H <sub>2</sub> O | 71.0                 |
| FeSO <sub>4</sub> ·7H <sub>2</sub> O | 17.4                 |
| Berberine                            | 121.6                |
